# Supplementary material
Source: publisher site journal article supplement (https://www.spandidos-publications.com/6002/downloadSupplementary)
Supplement: Supplementary file 1 [file downloadSupplementary]

## Sheet: 245 Grade2-3 STS
Supplementary Table I. The information of IA patients.
specimen number	gender	age	ICU	Galactomannan assay	Medical Imaging	collection
1	male	66	yes	+	CT	whole blood
2	female	78	yes	+	CT	whole blood
3	male	79	yes	+	CT	whole blood
4	male	75	yes	+	CT	whole blood
5	female	68	yes	+	CT	whole blood
6	female	75	yes	+	CT	whole blood
